# Supplementary material for: Organomercury(ii) and tellurium(ii) compounds with the “pincer” ligand 2,6-[O(CH2CH2)2NCH2]2C6H3– stabilization of an unusual organotellurium(ii) cationic species
Source: Royal Society of Chemistry journal article supplement (doi:10.1039/c1dt10414d), 2011-01-01
Supplement: c1dt10414d.pdf [file c1dt10414d.pdf]

## Electronic Supplementary Information

### **Organomercury(II) and -tellurium(II) compounds with the pincer ligand 2,6-[O(CH<sub>2</sub>CH<sub>2</sub>)<sub>2</sub>NCH<sub>2</sub>]<sub>2</sub>C<sub>6</sub>H<sub>3</sub> – stabilization of an unusual organotellurium(II) cationic species**

**Anca Beleaga,<sup>a</sup> Vilma R. Bojan,<sup>a</sup> Alpar Pöllnitz,<sup>a</sup> Ciprian I. Raț<sup>a,\*</sup> and Cristian Silvestru<sup>a,\*</sup>**

<sup>a</sup> Facultatea de Chimie si Inginerie Chimica, Universitatea Babes-Bolyai, RO-400028, Cluj-Napoca, Romania. Fax: (+40) 264-590818; Tel: (+40) 264-593833; E-mail: cristi@chem.ubbcluj.ro

1,3-[O(CH<sub>2</sub>CH<sub>2</sub>)<sub>2</sub>NCH<sub>2</sub>]<sub>2</sub>C<sub>6</sub>H<sub>4</sub> (1)

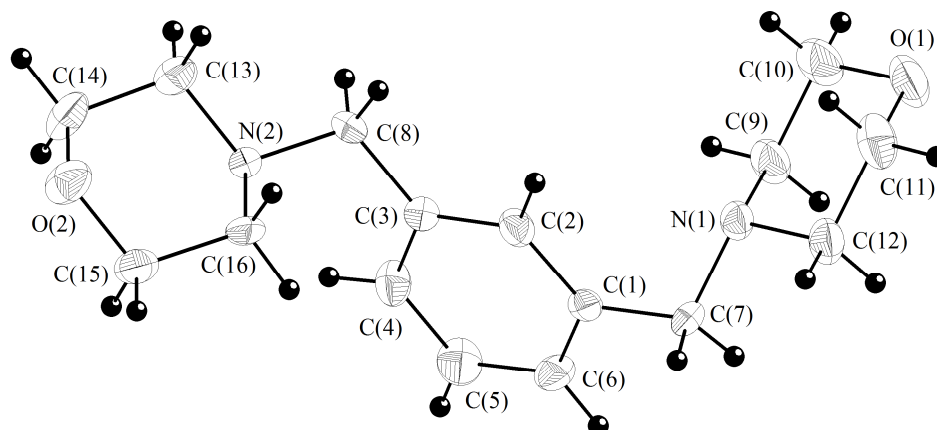

**Figure S1.** ORTEP representation at 30% probability and atom numbering scheme for the molecule of **1**.

**Table S1** Selected bond distances (Å) and angles (°) for compound **1**

|                  |           |                  |           |
|------------------|-----------|------------------|-----------|
| C(1)–C(2)        | 1.396(9)  | C(4)–C(5)        | 1.384(10) |
| C(2)–C(3)        | 1.392(9)  | C(5)–C(6)        | 1.386(10) |
| C(3)–C(4)        | 1.379(10) | C(1)–C(6)        | 1.384(10) |
| C(1)–C(7)        | 1.511(9)  | C(3)–C(12)       | 1.512(9)  |
| N(1)–C(7)        | 1.478(8)  | N(2)–C(12)       | 1.468(8)  |
| N(1)–C(8)        | 1.460(9)  | N(2)–C(13)       | 1.467(8)  |
| N(1)–C(11)       | 1.449(9)  | N(2)–C(16)       | 1.474(8)  |
| C(8)–C(9)        | 1.508(11) | C(13)–C(14)      | 1.522(11) |
| C(10)–C(11)      | 1.508(11) | C(15)–C(16)      | 1.508(10) |
| O(1)–C(9)        | 1.441(10) | O(2)–C(14)       | 1.420(9)  |
| O(1)–C(10)       | 1.436(11) | O(2)–C(15)       | 1.420(8)  |
| C(3)–C(2)–C(1)   | 122.3(6)  | C(6)–C(5)–C(4)   | 120.4(7)  |
| C(4)–C(3)–C(2)   | 118.4(6)  | C(5)–C(6)–C(1)   | 120.8(6)  |
| C(3)–C(4)–C(5)   | 120.3(7)  | C(6)–C(1)–C(2)   | 117.6(6)  |
| C(2)–C(1)–C(7)   | 121.2(6)  | C(2)–C(3)–C(12)  | 121.5(6)  |
| C(6)–C(1)–C(7)   | 121.2(6)  | C(4)–C(3)–C(12)  | 120.1(6)  |
| N(1)–C(7)–C(1)   | 114.1(5)  | N(2)–C(12)–C(3)  | 113.6(5)  |
| C(7)–N(1)–C(8)   | 111.4(6)  | C(13)–N(2)–C(12) | 111.8(5)  |
| C(11)–N(1)–C(7)  | 110.0(5)  | C(12)–N(2)–C(16) | 112.0(5)  |
| C(11)–N(1)–C(8)  | 108.5(5)  | C(13)–N(2)–C(16) | 108.6(5)  |
| N(1)–C(8)–C(9)   | 109.3(7)  | N(2)–C(13)–C(14) | 109.9(6)  |
| N(1)–C(11)–C(10) | 110.4(6)  | N(2)–C(16)–C(15) | 109.4(6)  |
| O(1)–C(9)–C(8)   | 111.7(7)  | O(2)–C(14)–C(13) | 110.9(6)  |
| O(1)–C(10)–C(11) | 111.9(7)  | O(2)–C(15)–C(16) | 112.1(6)  |
| C(10)–O(1)–C(9)  | 108.3(6)  | C(14)–O(2)–C(15) | 110.0(5)  |

### [2,6-{O(CH<sub>2</sub>CH<sub>2</sub>)<sub>2</sub>NCH<sub>2</sub>}<sub>2</sub>C<sub>6</sub>H<sub>3</sub>]HgOAc (**2**)

- the crystal contains a 1:1 mixture of (*S*<sub>N1</sub>,*R*<sub>N2</sub>) and (*R*<sub>N1</sub>,*S*<sub>N2</sub>) isomers

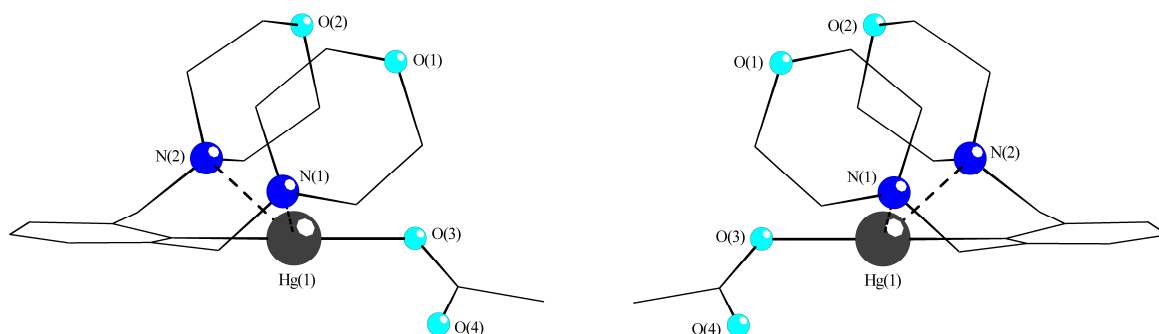

**Figure S2.** Molecular structure of (*S*<sub>N1</sub>,*R*<sub>N2</sub>)-**2** isomer (*left*) and (*R*<sub>N1</sub>,*S*<sub>N2</sub>)-**2** isomer (*right*) in the crystal of **2** (hydrogen atoms are not shown).

- the crystal of **2** contains pairs of isomers of same type, *i.e.* (*S*<sub>N1</sub>,*R*<sub>N2</sub>) or (*R*<sub>N1</sub>,*S*<sub>N2</sub>), respectively, connected through weak O(4)⋯H(12Aa) contacts. No further inter-dimer contacts are present.

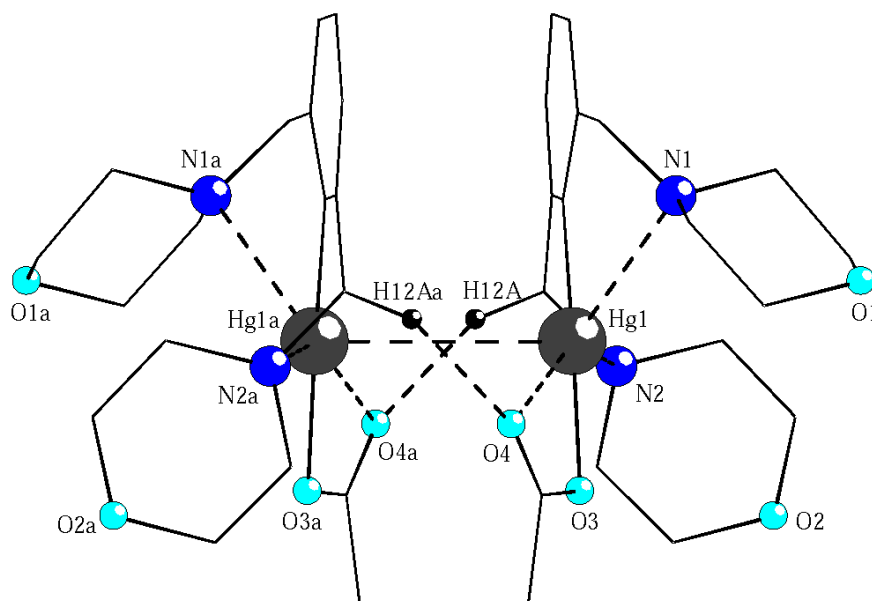

**Figure S3.** View along *c* axis of a dimer based on O⋯H<sub>methylene</sub> contacts between (*S*<sub>N1</sub>,*R*<sub>N2</sub>)-**2** isomers in the crystal of **2** (only hydrogen atoms involved in intermolecular contacts are shown) [symmetry equivalent atoms ( $1 - x, y, 0.5 - z$ ) are given by “a”].

- intramolecular distance                      Hg(1)⋯O(4) 2.871(9) Å                       $\sum r_{\text{vdW}}(\text{Hg},\text{O})$  2.90 Å
- intermolecular distance                      O(4)⋯H(12Aa) 2.57 Å                       $\sum r_{\text{vdW}}(\text{O},\text{H})$  2.60 Å
- Hg(1)⋯Hg(1a) 3.614(6) Å                       $\sum r_{\text{vdW}}(\text{Hg},\text{Hg})$  3.00 Å

[2,6-{O(CH<sub>2</sub>CH<sub>2</sub>)<sub>2</sub>NCH<sub>2</sub>}<sub>2</sub>C<sub>6</sub>H<sub>3</sub>]HgCl (**3**)

- the crystal contains a 1:1 mixture of (*R*<sub>N1</sub>,*R*<sub>N2</sub>) and (*S*<sub>N1</sub>,*S*<sub>N2</sub>) isomers

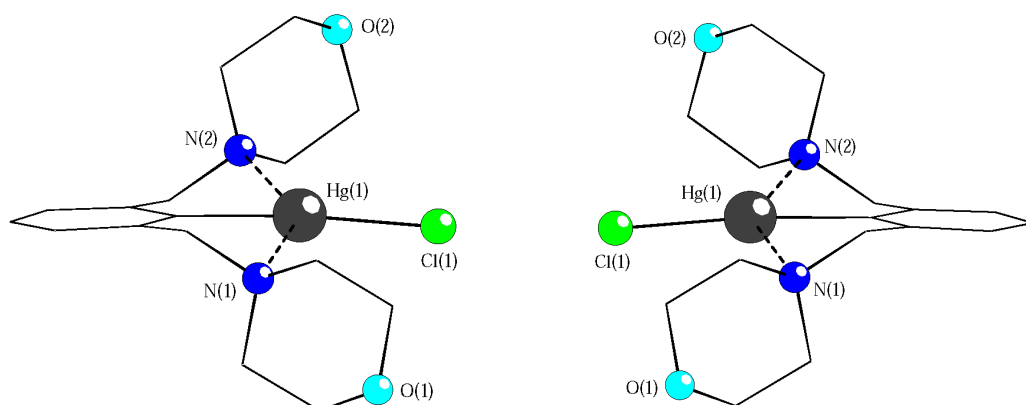

**Figure S4.** Molecular structure of (*R*<sub>N1</sub>,*R*<sub>N2</sub>)-**3** isomer (*left*) and (*S*<sub>N1</sub>,*S*<sub>N2</sub>)-**3** isomer (*right*) in the crystal of **3** (hydrogen atoms are not shown).

- the crystal of **3** contains parallel chains built from (*R*<sub>N1</sub>,*R*<sub>N2</sub>) and (*S*<sub>N1</sub>,*S*<sub>N2</sub>) isomers, respectively, connected through weak contacts between mercury and oxygen atoms [Hg(1)⋯O(1a) 2.878(5) Å] from only one pendant arm per ligand unit.

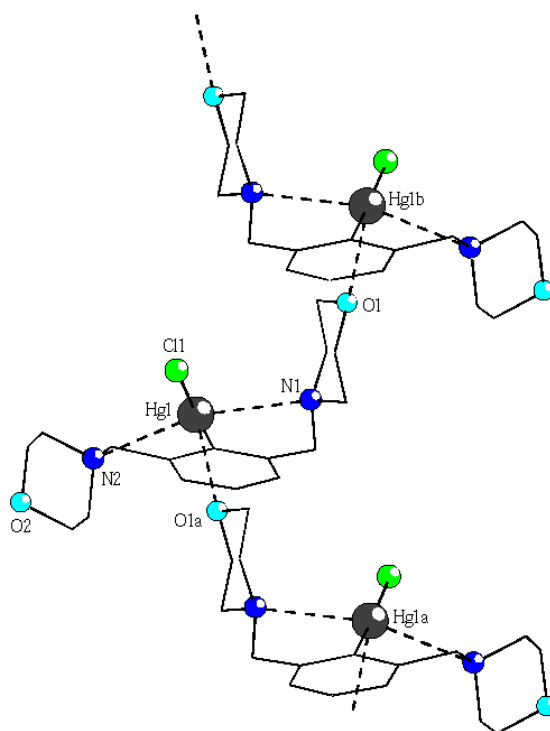

**Figure S5.** View of a chain polymer association based on Hg⋯O contacts between (*R*<sub>N1</sub>,*R*<sub>N2</sub>)-**3** isomers in the crystal of **3** (hydrogen atoms are not shown) [symmetry equivalent atoms (−0.5 − *x*, −0.5 + *y*, 0.5 − *z*) and (−0.5 − *x*, 0.5 + *y*, 0.5 − *z*) are given by “a” and “b”, respectively].

- intermolecular distance                      Hg(1)⋯O(1a) 2.878(5) Å                      Σ*r*<sub>vdW</sub>(Hg,O) 2.90 Å

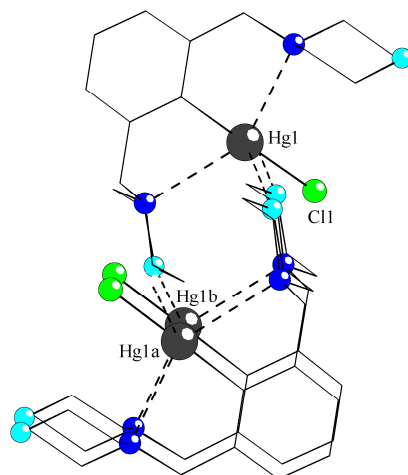

**Figure S6.** View along chain polymer association between  $(R_{N1}, R_{N2})$ -**3** isomers in the crystal of **3** (hydrogen atoms are not shown) [symmetry equivalent atoms  $(-0.5 - x, -0.5 + y, 0.5 - z)$  and  $(-0.5 - x, 0.5 + y, 0.5 - z)$  are given by “a” and “b”, respectively].

- weak inter-chain contacts between chlorine atoms and  $H_{\text{methylene}}$  of the morpholinyl rings or aromatic hydrogen atoms results in a 3D supramolecular network.

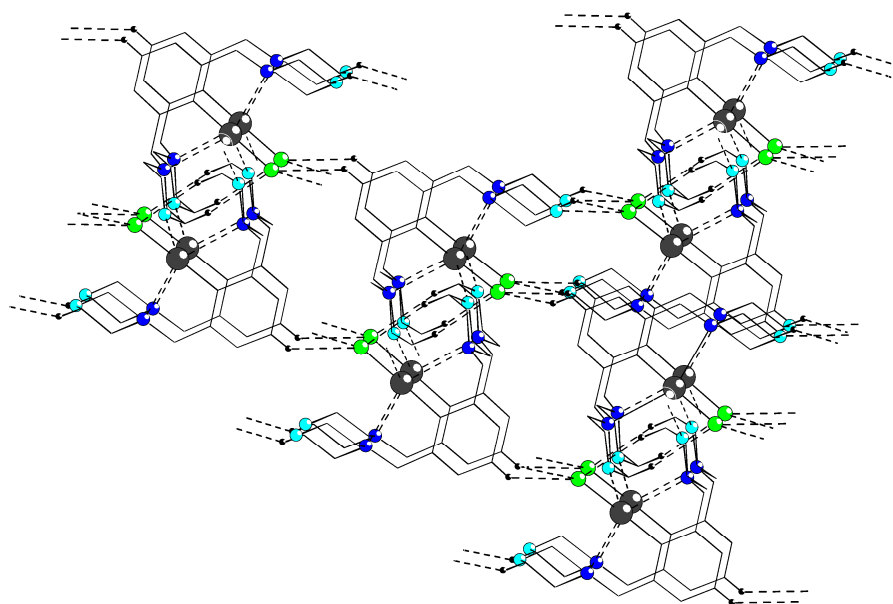

**Figure S7.** View of the 3D network built through weak chlorine-hydrogen contacts between chain polymers of  $(R_{N1}, R_{N2})$ -**3** and  $(S_{N1}, S_{N2})$ -**3** isomers, respectively, in the crystal of **3** (only hydrogen atoms involved in intra- and intermolecular contacts are shown) [symmetry equivalent atoms  $(-0.5 + x, 1.5 - y, -0.5 + z)$  and  $(-x, 2 - y, -z)$  are given by “a prime” and “b prime”, respectively].

- |                            |                         |                                                   |
|----------------------------|-------------------------|---------------------------------------------------|
| - intramolecular distance  | Cl(1)···H(10A) 2.91 Å   | $\sum r_{\text{vdW}}(\text{Cl}, \text{H})$ 3.01 Å |
| - intermolecular distances | Cl(1)···H(15Bb') 2.83 Å |                                                   |
|                            | Cl(1)···H(4a') 2.98 Å   |                                                   |

**[2,6-{O(CH<sub>2</sub>CH<sub>2</sub>)<sub>2</sub>NCH<sub>2</sub>}<sub>2</sub>C<sub>6</sub>H<sub>3</sub>Te]<sub>2</sub>[Hg<sub>2</sub>Cl<sub>6</sub>] (4)**

- the crystal contains a 1:1 mixture of (*R*<sub>N1</sub>,*R*<sub>N2</sub>) and (*S*<sub>N1</sub>,*S*<sub>N2</sub>) isomers of the cation

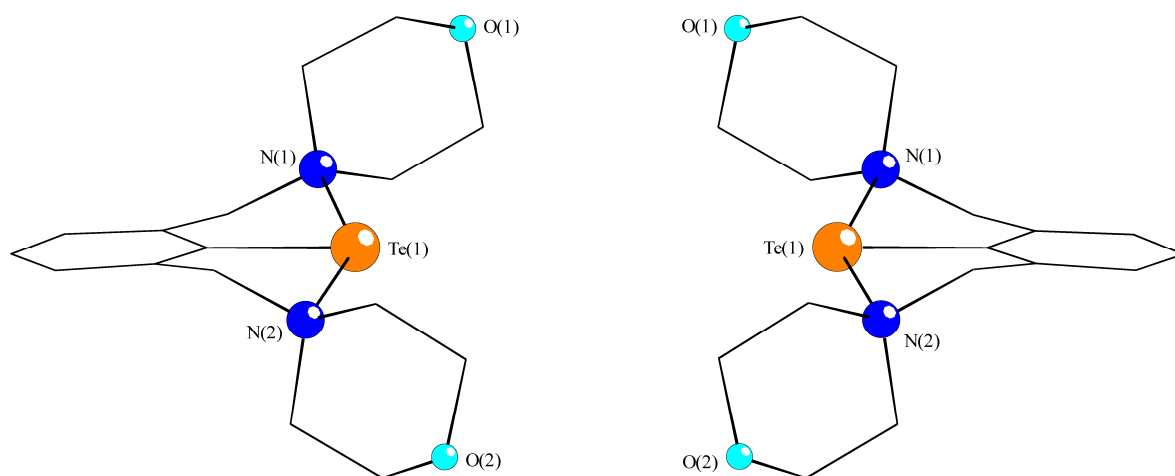

**Figure S8.** Structure of (*R*<sub>N1</sub>,*R*<sub>N2</sub>) cation (*left*) and (*S*<sub>N1</sub>,*S*<sub>N2</sub>) cation (*right*) in the crystal of **4** (hydrogen atoms are not shown).

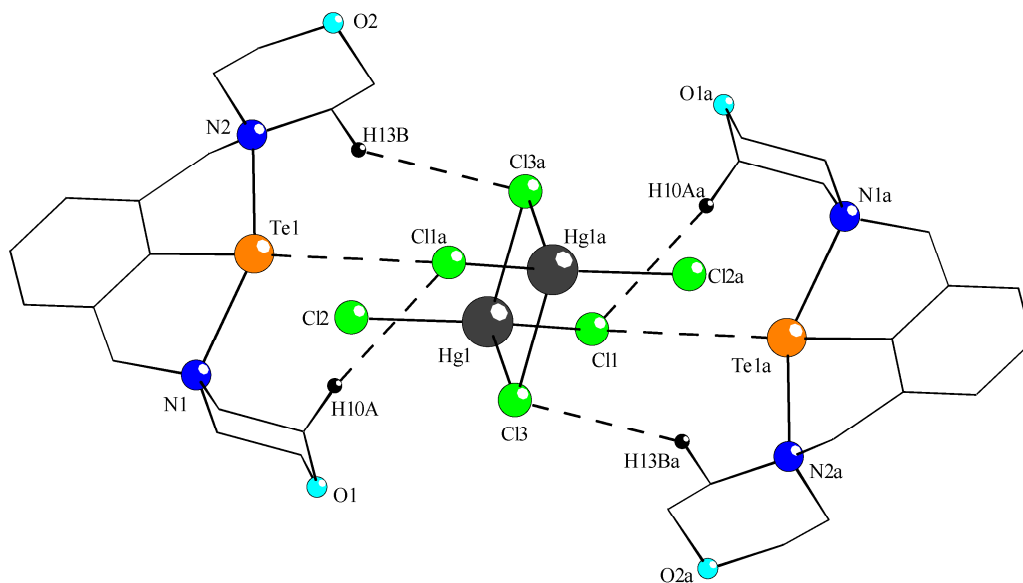

**Figure S9.** View of the Te...Cl and Cl...H<sub>methylene</sub> contacts between pairs of (*R*<sub>N1</sub>,*R*<sub>N2</sub>)-[RTe]<sup>+</sup> and (*S*<sub>N1</sub>,*S*<sub>N2</sub>)-[RTe]<sup>+</sup> cations and the [Hg<sub>2</sub>Cl<sub>6</sub>]<sup>2-</sup> dianion in the crystal of **4** (only hydrogen atoms involved in cation-anion contacts are shown) [symmetry equivalent atoms (1 - *x*, -*y*, -*z*) are given by ‘prime’].

- cation-anion distances
 

|                 |            |                                                                                         |
|-----------------|------------|-----------------------------------------------------------------------------------------|
| Te(1)···Cl(1a)  | 3.869(3) Å | $\sum r_{\text{vdW}}(\text{Te,Cl})$ 3.90 Å<br>$\sum r_{\text{vdW}}(\text{Cl,H})$ 3.01 Å |
| Cl(1)···H(10Aa) | 2.92 Å     |                                                                                         |
| Cl(3)···H(13Ba) | 2.98 Å     |                                                                                         |



[1,3-{O(CH<sub>2</sub>CH<sub>2</sub>)<sub>2</sub>NHCH<sub>2</sub>]<sub>2</sub>C<sub>6</sub>H<sub>4</sub>][HgCl<sub>4</sub>]·H<sub>2</sub>O (5·H<sub>2</sub>O)

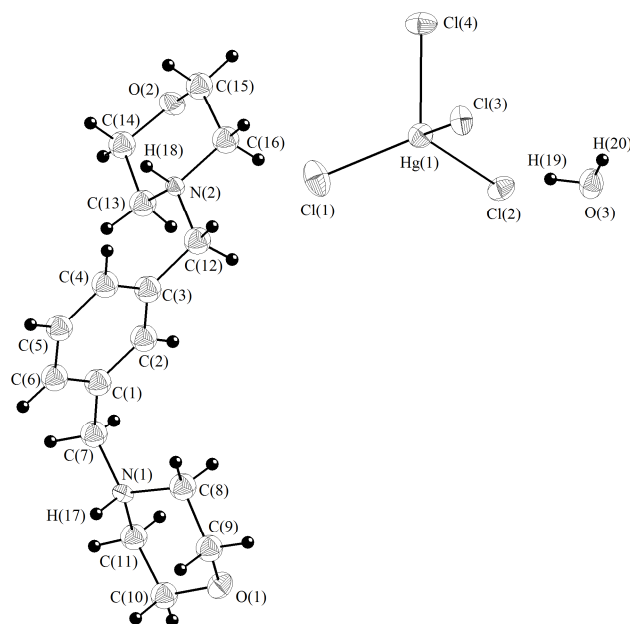

**Figure S12.** ORTEP representation at 30% probability and atom numbering scheme for the dication and the dianion in the crystal of 5·H<sub>2</sub>O.

**Table S2.** Selected bond distances (Å) and angles (°) for compound 5·H<sub>2</sub>O

|                |            |                 |            |
|----------------|------------|-----------------|------------|
| C(1)–C(2)      | 1.373(9)   | C(4)–C(5)       | 1.375(9)   |
| C(2)–C(3)      | 1.387(9)   | C(5)–C(6)       | 1.390(10)  |
| C(3)–C(4)      | 1.372(9)   | C(1)–C(6)       | 1.389(10)  |
| C(1)–C(7)      | 1.510(9)   | C(3)–C(12)      | 1.503(9)   |
| N(1)–C(7)      | 1.485(8)   | N(2)–C(12)      | 1.491(8)   |
| N(1)–C(8)      | 1.495(8)   | N(2)–C(13)      | 1.494(8)   |
| N(1)–C(11)     | 1.508(8)   | N(2)–C(16)      | 1.503(8)   |
| N(1)–H(17)     | 0.853(19)  | N(2)–H(18)      | 0.86(2)    |
| C(8)–C(9)      | 1.496(9)   | C(13)–C(14)     | 1.520(9)   |
| C(10)–C(11)    | 1.481(10)  | C(15)–C(16)     | 1.504(9)   |
| O(1)–C(9)      | 1.432(8)   | O(2)–C(14)      | 1.420(8)   |
| O(1)–C(10)     | 1.400(10)  | O(2)–C(15)      | 1.386(8)   |
| Hg(1)–Cl(1)    | 2.411(2)   | Hg(1)–Cl(3)     | 2.5130(18) |
| Hg(1)–Cl(2)    | 2.4475(18) | Hg(1)–Cl(4)     | 2.5614(19) |
| O(3)–H(19)     | 0.89(6)    | O(3)–H(20)      | 0.89(6)    |
| C(3)–C(2)–C(1) | 121.4(6)   | C(6)–C(5)–C(4)  | 121.4(7)   |
| C(4)–C(3)–C(2) | 119.3(6)   | C(5)–C(6)–C(1)  | 118.6(6)   |
| C(3)–C(4)–C(5) | 119.8(6)   | C(6)–C(1)–C(2)  | 119.6(6)   |
| C(2)–C(1)–C(7) | 119.5(7)   | C(2)–C(3)–C(12) | 119.3(6)   |
| C(6)–C(1)–C(7) | 120.9(6)   | C(4)–C(3)–C(12) | 121.4(6)   |
| N(1)–C(7)–C(1) | 113.9(5)   | N(2)–C(12)–C(3) | 112.7(5)   |



|                   |           |                   |           |
|-------------------|-----------|-------------------|-----------|
| C(7)–N(1)–C(8)    | 115.7(5)  | C(13)–N(2)–C(12)  | 113.5(5)  |
| C(11)–N(1)–C(7)   | 111.5(5)  | C(12)–N(2)–C(16)  | 112.8(5)  |
| C(11)–N(1)–C(8)   | 107.8(5)  | C(13)–N(2)–C(16)  | 109.5(5)  |
| C(7)–N(1)–H(17)   | 109(4)    | C(12)–N(2)–H(18)  | 110(4)    |
| C(8)–N(1)–H(17)   | 111(4)    | C(13)–N(2)–H(18)  | 103(4)    |
| C(11)–N(1)–H(17)  | 101(4)    | C(16)–N(2)–H(18)  | 107(4)    |
| N(1)–C(8)–C(9)    | 111.6(5)  | N(2)–C(13)–C(14)  | 110.3(5)  |
| N(1)–C(11)–C(10)  | 112.7(6)  | N(2)–C(16)–C(15)  | 109.5(5)  |
| O(1)–C(9)–C(8)    | 110.7(6)  | O(2)–C(14)–C(13)  | 112.2(6)  |
| O(1)–C(10)–C(11)  | 112.5(6)  | O(2)–C(15)–C(16)  | 113.0(5)  |
| C(10)–O(1)–C(9)   | 110.4(5)  | C(14)–O(2)–C(15)  | 109.8(5)  |
| Cl(1)–Hg(1)–Cl(2) | 119.23(7) | Cl(2)–Hg(1)–Cl(3) | 107.35(6) |
| Cl(1)–Hg(1)–Cl(3) | 111.48(6) | Cl(2)–Hg(1)–Cl(4) | 104.28(6) |
| Cl(1)–Hg(1)–Cl(4) | 111.40(9) | Cl(3)–Hg(1)–Cl(4) | 101.43(6) |
| H(19)–O(3)–H(20)  | 109(7)    |                   |           |

---

- two polymeric chains of alternating water molecules and  $[\text{HgCl}_4]^{2-}$  dianions are bridged by  $[1,3-\{\text{O}(\text{CH}_2\text{CH}_2)_2\text{NHCH}_2\}_2\text{C}_6\text{H}_4]^{2+}$  dications

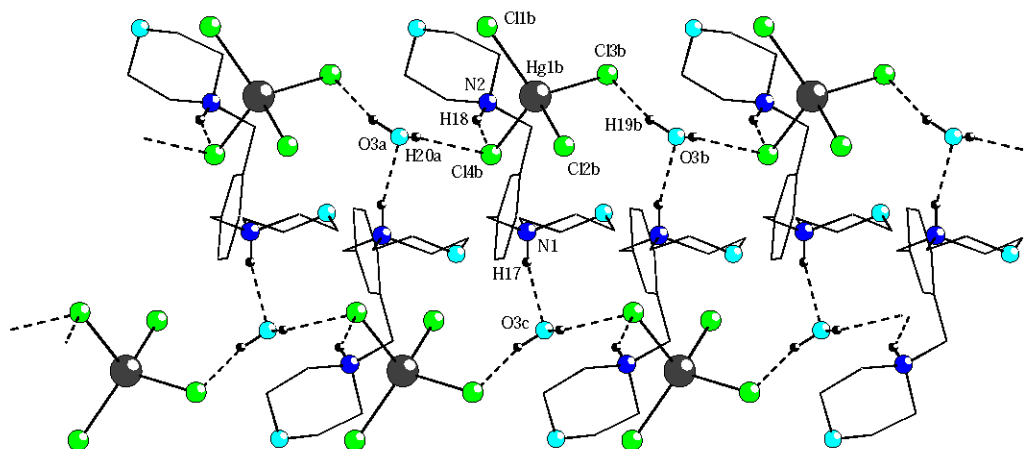

**Figure S13.** View along *b* axis of the polymeric chains of alternating water molecules and  $[\text{HgCl}_4]^{2-}$  dianions bridged by  $[1,3-\{\text{O}(\text{CH}_2\text{CH}_2)_2\text{NHCH}_2\}_2\text{C}_6\text{H}_4]^{2+}$  dications in the crystal of  $5 \cdot \text{H}_2\text{O}$  (only hydrogen atoms involved in hydrogen bonding are shown) [symmetry equivalent atoms  $(-0.5 + x, 1.5 - y, 1 - z)$ ,  $(0.5 + x, 1.5 - y, 1 - z)$  and  $(x, y, 1 + z)$  are given by ‘‘a’’, ‘‘b’’ and ‘‘c’’, respectively].

- hydrogen bonding
 

|                                      |        |                                            |        |
|--------------------------------------|--------|--------------------------------------------|--------|
| $\text{Cl}(3b) \cdots \text{H}(19b)$ | 2.47 Å | $\sum r_{\text{vdW}}(\text{Cl}, \text{H})$ | 3.01 Å |
| $\text{Cl}(4b) \cdots \text{H}(20a)$ | 2.42 Å |                                            |        |
| $\text{Cl}(4b) \cdots \text{H}(18)$  | 2.37 Å |                                            |        |
| $\text{O}(3c) \cdots \text{H}(17)$   | 1.98 Å | $\sum r_{\text{vdW}}(\text{O}, \text{H})$  | 2.60 Å |

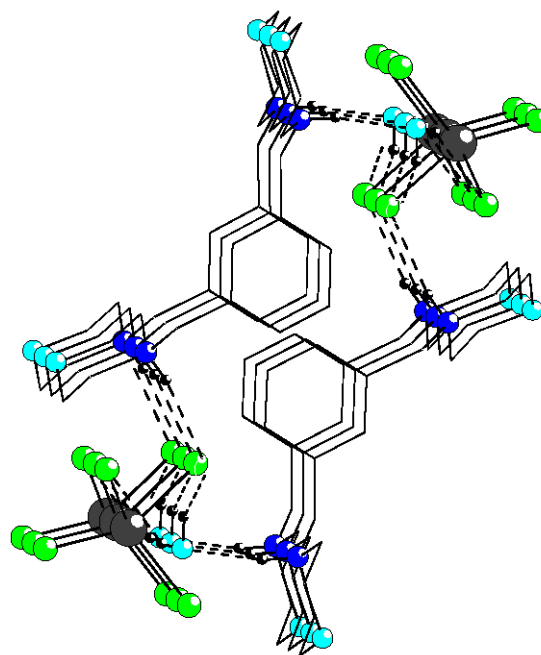

**Figure S14.** View along *a* axis of the polymeric chains of alternating water molecules and  $[\text{HgCl}_4]^{2-}$  dianions bridged by  $[1,3-\{\text{O}(\text{CH}_2\text{CH}_2)_2\text{NHCH}_2\}_2\text{C}_6\text{H}_4]^{2+}$  dications in the crystal of  $5 \cdot \text{H}_2\text{O}$ .

**Table S3.** Comparison of selected experimental (X-ray) and theoretical (BP86/def2-TZVP) bond lengths (Å) and bond angles (°) of **3**.

|                      | X-ray      | 3b    | %    |
|----------------------|------------|-------|------|
| Hg(1)–C(1)           | 2.066(6)   | 2.079 | 0.6  |
| Hg(1)–Cl(1)          | 2.3152(17) | 2.332 | 0.7  |
| Hg(1)–N(1)           | 2.840(5)   | 2.952 | 3.9  |
| Hg(1)–N(2)           | 2.877(5)   | 3.011 | 4.6  |
| C(2)–C(7)–N(1)       | 116.5(6)   | 114.0 | –2.1 |
| C(6)–C(12)–N(2)      | 114.5(5)   | 113.7 | –0.7 |
| C(1)–C(2)–C(7)–N(1)  | 41.5(9)    | 47.1  | 13.5 |
| C(1)–C(6)–C(12)–N(2) | 41.1(10)   | 50.0  | 21.6 |

**Table S4.** Comparison of selected experimental (X-ray) and theoretical (BP86/def2-TZVP) bond lengths (Å) and bond angles (°) of **4**, **4a**, **4b** and **4e**.

|                      | X-ray      | 4a    | %     | 4b    | %    | 4e    | %     |
|----------------------|------------|-------|-------|-------|------|-------|-------|
| Te(1)–C(1)           | 2.074(8)   | 2.108 | 1.6   | 2.095 | 1.0  |       |       |
| Te(1)–N(1)           | 2.392(7)   | 2.475 | 3.5   | 2.443 | 2.1  |       |       |
| Te(1)–N(2)           | 2.354(7)   | 2.448 | 4.0   | 2.443 | 3.6  |       |       |
| C(2)–C(7)–N(1)       | 110.7(7)   | 111.1 | 0.4   | 111.2 | 0.4  |       |       |
| C(6)–C(12)–N(2)      | 108.5(7)   | 110.7 | 2.1   | 111.2 | 2.4  |       |       |
| C(1)–C(2)–C(7)–N(1)  | 30.3(12)   | 35.9  | 18.5  | 33.9  | 10.6 |       |       |
| C(1)–C(6)–C(12)–N(2) | 37.0(11)   | 36.8  | –0.5  | 34.0  | –8.9 |       |       |
| Te(1)⋯Cl(1a)         | 3.869(3)   | 3.240 | –16.3 |       |      |       |       |
| Te(1)⋯Cl(2)          | 4.029(3)   | 3.950 | –2.0  |       |      |       |       |
| Hg(1a)–Cl(1a)        | 2.373(3)   | 2.597 | 9.5   |       |      | 2.484 | 4.7   |
| Hg(1a)–Cl(2a)        | 2.382(3)   | 2.412 | 1.3   |       |      | 2.486 | 4.4   |
| Hg(1a)–Cl(3a)        | 2.586(3)   | 2.597 | 0.4   |       |      | 2.656 | 2.7   |
| Hg(1a)–Cl(3)         | 2.748(3)   | 2.690 | –2.1  |       |      | 2.703 | –1.7  |
| Cl(1a)–Hg(1a)–Cl(2a) | 133.02(11) | 113.4 | –14.8 |       |      | 118.4 | –11.0 |

**Table S5.** Cartesian coordinates (Å) of the optimized structure (BP86/def2-TZVP) of the anion **RHgCl (3a)**; both nitrogen atoms coordinated to the mercury atom.

| Atom | x        | y        | z        |
|------|----------|----------|----------|
| C    | 3.166177 | 3.850364 | 4.280954 |
| C    | 3.309341 | 5.245680 | 4.373955 |
| C    | 3.556041 | 5.824239 | 5.627922 |
| H    | 3.678167 | 6.907899 | 5.700786 |
| C    | 3.641970 | 5.033704 | 6.773474 |
| H    | 3.829281 | 5.494798 | 7.744473 |
| C    | 3.486672 | 3.651159 | 6.672920 |
| H    | 3.548393 | 3.027090 | 7.567985 |
| C    | 3.255176 | 3.044562 | 5.429818 |
| C    | 3.146651 | 6.153557 | 3.164020 |
| H    | 2.077384 | 6.198384 | 2.893004 |

|    |           |           |           |
|----|-----------|-----------|-----------|
| H  | 3.441351  | 7.187418  | 3.447846  |
| C  | 3.149961  | 1.529513  | 5.353321  |
| H  | 4.048670  | 1.130231  | 4.851681  |
| H  | 3.156052  | 1.115249  | 6.385352  |
| C  | 5.325077  | 5.823069  | 2.127285  |
| H  | 5.643877  | 5.240696  | 3.005436  |
| H  | 5.612865  | 6.884251  | 2.300724  |
| C  | 6.030300  | 5.307474  | 0.877638  |
| H  | 7.113931  | 5.473103  | 0.952653  |
| H  | 5.842458  | 4.221592  | 0.762850  |
| C  | 4.181057  | 5.848850  | -0.452452 |
| H  | 3.928938  | 4.781626  | -0.603044 |
| H  | 3.909496  | 6.410559  | -1.356683 |
| C  | 3.425938  | 6.388356  | 0.757536  |
| H  | 3.591011  | 7.486179  | 0.834312  |
| H  | 2.345728  | 6.216521  | 0.626383  |
| C  | 0.723426  | 1.338680  | 5.278120  |
| H  | 0.643397  | 2.422678  | 5.452136  |
| H  | 0.689724  | 0.832161  | 6.269057  |
| C  | -0.449634 | 0.861567  | 4.429143  |
| H  | -1.395690 | 0.994115  | 4.972122  |
| H  | -0.492657 | 1.446811  | 3.489238  |
| C  | 0.876902  | -0.795107 | 3.437807  |
| H  | 0.887073  | -0.263410 | 2.466936  |
| H  | 0.899656  | -1.877532 | 3.251459  |
| C  | 2.084380  | -0.370007 | 4.266511  |
| H  | 2.134151  | -0.991941 | 5.188248  |
| H  | 3.007366  | -0.543026 | 3.690605  |
| N  | 3.869609  | 5.698632  | 1.975759  |
| N  | 1.991118  | 1.058143  | 4.592910  |
| O  | 5.595021  | 6.000948  | -0.292394 |
| O  | -0.347821 | -0.530977 | 4.129125  |
| Hg | 2.833943  | 2.971776  | 2.426777  |
| Cl | 2.486073  | 1.971967  | 0.348694  |

**Table S6.** Cartesian coordinates (Å) of the optimized structure (BP86/def2-TZVP) of **RHgCl (3b)**; one nitrogen atom coordinated to the mercury atom.

| <b>Atom</b> | <b>x</b> | <b>y</b> | <b>z</b> |
|-------------|----------|----------|----------|
| C           | 2.092836 | 3.853501 | 5.571074 |
| C           | 2.222225 | 5.254090 | 5.658736 |
| C           | 3.477468 | 5.836182 | 5.446384 |
| H           | 3.578212 | 6.923217 | 5.497905 |
| C           | 4.591760 | 5.041681 | 5.167658 |
| H           | 5.565513 | 5.505993 | 5.002725 |
| C           | 4.458616 | 3.657563 | 5.099324 |
| H           | 5.317419 | 3.022306 | 4.874951 |
| C           | 3.208713 | 3.046214 | 5.296282 |
| C           | 1.047092 | 6.144096 | 6.030813 |
| H           | 0.829018 | 6.021398 | 7.106057 |

|    |           |           |          |
|----|-----------|-----------|----------|
| H  | 1.337978  | 7.206757  | 5.888301 |
| C  | 3.125326  | 1.528287  | 5.268165 |
| H  | 3.511923  | 1.135230  | 6.224821 |
| H  | 2.054156  | 1.220820  | 5.219756 |
| C  | -0.101897 | 6.191555  | 3.883632 |
| H  | 0.742868  | 5.651838  | 3.428999 |
| H  | 0.090920  | 7.281266  | 3.771339 |
| C  | -1.398933 | 5.832253  | 3.167623 |
| H  | -1.367052 | 6.173326  | 2.123659 |
| H  | -1.542233 | 4.733487  | 3.178632 |
| C  | -2.625239 | 6.091755  | 5.144923 |
| H  | -2.802303 | 5.002216  | 5.224026 |
| H  | -3.495839 | 6.624623  | 5.550867 |
| C  | -1.365135 | 6.465488  | 5.918186 |
| H  | -1.255791 | 7.572060  | 5.932181 |
| H  | -1.452920 | 6.119686  | 6.960280 |
| C  | 3.342764  | 1.170515  | 2.873287 |
| H  | 3.277011  | 2.257957  | 2.715198 |
| H  | 2.314188  | 0.750604  | 2.789369 |
| C  | 4.228559  | 0.548675  | 1.799945 |
| H  | 3.773511  | 0.665869  | 0.806771 |
| H  | 5.218435  | 1.046969  | 1.801369 |
| C  | 4.952670  | -1.106172 | 3.293632 |
| H  | 5.968697  | -0.667549 | 3.354407 |
| H  | 5.029923  | -2.197823 | 3.391678 |
| C  | 4.080655  | -0.527109 | 4.402453 |
| H  | 3.102272  | -1.059017 | 4.410523 |
| H  | 4.563035  | -0.695614 | 5.378727 |
| N  | -0.188718 | 5.828954  | 5.306430 |
| N  | 3.909606  | 0.914725  | 4.201597 |
| O  | -2.522906 | 6.474145  | 3.769674 |
| O  | 4.393017  | -0.856696 | 2.002662 |
| Hg | 0.190472  | 3.046824  | 5.812791 |
| Cl | -1.914513 | 2.094050  | 6.104798 |

**Table S7.** Cartesian coordinates (Å) of the optimized structure (BP86/def2-TZVP) of **RHgCl (3c)**; no nitrogen atom coordinated to the mercury atom.

| <b>Atom</b> | <b>x</b> | <b>y</b> | <b>z</b> |
|-------------|----------|----------|----------|
| C           | 2.530084 | 4.859333 | 4.333894 |
| C           | 2.157891 | 5.165917 | 5.656670 |
| C           | 2.915940 | 4.639723 | 6.712744 |
| H           | 2.617611 | 4.879051 | 7.734983 |
| C           | 4.017142 | 3.823499 | 6.459313 |
| H           | 4.598335 | 3.418953 | 7.289984 |
| C           | 4.376784 | 3.523208 | 5.146800 |
| H           | 5.240961 | 2.892097 | 4.931992 |
| C           | 3.641669 | 4.037677 | 4.068489 |
| C           | 1.004669 | 6.102049 | 5.982276 |
| H           | 1.410824 | 7.102309 | 6.213567 |

|    |           |          |          |
|----|-----------|----------|----------|
| H  | 0.366665  | 6.233570 | 5.074166 |
| C  | 4.040158  | 3.630464 | 2.658902 |
| H  | 3.693909  | 2.598748 | 2.473450 |
| H  | 3.499968  | 4.271977 | 1.920224 |
| C  | -0.571880 | 4.471944 | 6.861344 |
| H  | 0.107776  | 3.664565 | 6.548720 |
| H  | -1.299471 | 4.644708 | 6.035616 |
| C  | -1.326851 | 4.050723 | 8.116769 |
| H  | -1.981371 | 3.194027 | 7.905397 |
| H  | -0.603783 | 3.762513 | 8.905572 |
| C  | -1.407163 | 6.269710 | 8.868195 |
| H  | -0.683173 | 6.064914 | 9.681983 |
| H  | -2.119023 | 7.033881 | 9.209445 |
| C  | -0.658248 | 6.747815 | 7.628685 |
| H  | -1.396421 | 7.066508 | 6.858263 |
| H  | -0.039550 | 7.622917 | 7.884641 |
| C  | 6.025021  | 5.012415 | 2.408338 |
| H  | 5.783448  | 5.510475 | 3.359767 |
| H  | 5.572478  | 5.610971 | 1.584836 |
| C  | 7.537322  | 4.965512 | 2.222830 |
| H  | 7.946290  | 5.980342 | 2.123410 |
| H  | 8.003945  | 4.476012 | 3.100701 |
| C  | 7.376940  | 2.938137 | 1.057549 |
| H  | 7.832029  | 2.372640 | 1.895107 |
| H  | 7.672690  | 2.468683 | 0.109220 |
| C  | 5.859266  | 2.937305 | 1.207582 |
| H  | 5.404468  | 3.401386 | 0.303271 |
| H  | 5.494451  | 1.899665 | 1.273438 |
| N  | 0.214400  | 5.680370 | 7.131686 |
| N  | 5.479546  | 3.651028 | 2.430076 |
| O  | -2.175621 | 5.096421 | 8.595531 |
| O  | 7.899444  | 4.267603 | 1.029132 |
| Hg | 1.430719  | 5.648746 | 2.749844 |
| Cl | 0.213984  | 6.547629 | 0.987077 |

**Table S8.** Cartesian coordinates (Å) of the optimized structure (BP86/def2-TZVP) of the anion [(RTe)(Hg<sub>2</sub>Cl<sub>6</sub>)]<sup>-</sup> (**4a**).

| Atom | x        | y        | z        |
|------|----------|----------|----------|
| C    | 2.845973 | 4.441603 | 4.997332 |
| C    | 3.062345 | 5.815302 | 5.111280 |
| C    | 3.438469 | 6.343955 | 6.350393 |
| H    | 3.624167 | 7.415682 | 6.456745 |
| C    | 3.571204 | 5.496228 | 7.456536 |
| H    | 3.862770 | 5.909420 | 8.423124 |
| C    | 3.349801 | 4.119076 | 7.328175 |
| H    | 3.476602 | 3.462820 | 8.192406 |
| C    | 2.996985 | 3.581242 | 6.087049 |
| C    | 2.817247 | 6.629560 | 3.867187 |
| H    | 1.735776 | 6.829740 | 3.763389 |
| H    | 3.342165 | 7.601588 | 3.898121 |

|    |           |           |           |
|----|-----------|-----------|-----------|
| C  | 2.853029  | 2.112475  | 5.789735  |
| H  | 3.803631  | 1.752391  | 5.351785  |
| H  | 2.624118  | 1.518898  | 6.692179  |
| C  | 4.714232  | 5.814408  | 2.535308  |
| H  | 5.103130  | 5.208852  | 3.366746  |
| H  | 5.104145  | 6.846669  | 2.621881  |
| C  | 5.144306  | 5.211635  | 1.206952  |
| H  | 6.236223  | 5.271206  | 1.115231  |
| H  | 4.864012  | 4.145586  | 1.139700  |
| C  | 3.167956  | 5.851001  | 0.159235  |
| H  | 2.841056  | 4.794775  | 0.093162  |
| H  | 2.777036  | 6.388034  | -0.716599 |
| C  | 2.633249  | 6.502518  | 1.430160  |
| H  | 2.892691  | 7.578587  | 1.428292  |
| H  | 1.539386  | 6.400364  | 1.490928  |
| C  | 0.434404  | 2.095537  | 5.326314  |
| H  | 0.349630  | 3.142812  | 5.650151  |
| H  | 0.321398  | 1.441505  | 6.211613  |
| C  | -0.639235 | 1.748551  | 4.300487  |
| H  | -1.633036 | 1.849310  | 4.760504  |
| H  | -0.575677 | 2.447067  | 3.442382  |
| C  | 0.765240  | 0.218064  | 3.232474  |
| H  | 0.849003  | 0.857969  | 2.333438  |
| H  | 0.816597  | -0.828770 | 2.909646  |
| C  | 1.899575  | 0.502618  | 4.202979  |
| H  | 1.857963  | -0.208316 | 5.049120  |
| H  | 2.865284  | 0.391168  | 3.688499  |
| N  | 3.222935  | 5.880620  | 2.648291  |
| N  | 1.796326  | 1.882640  | 4.763137  |
| O  | 4.588893  | 5.945694  | 0.108675  |
| O  | -0.519013 | 0.404051  | 3.856357  |
| Te | 2.327951  | 3.623025  | 3.125207  |
| Cl | 8.305857  | -0.822290 | 1.992418  |
| Cl | 5.966593  | 2.291578  | 3.894199  |
| Cl | 5.693315  | 1.901801  | -0.190185 |
| Hg | 6.360201  | 0.597112  | 2.093945  |
| Cl | 1.577956  | 2.401271  | 0.219405  |
| Cl | 2.797546  | -0.590372 | -2.444578 |
| Cl | 4.026655  | -0.701723 | 1.700727  |
| Hg | 3.408992  | 0.707943  | -0.506058 |

**Table S9.** Cartesian coordinates (Å) of the optimized structure (BP86/def2-TZVP) of the cation  $[\text{RTe}]^+$  (**4b**); both nitrogen atoms coordinated to the tellurium atom.

| Atom | x        | y        | z        |
|------|----------|----------|----------|
| C    | 3.256232 | 4.008011 | 4.622295 |
| C    | 3.505127 | 5.374924 | 4.725814 |
| C    | 3.901128 | 5.884494 | 5.967465 |
| H    | 4.109297 | 6.950085 | 6.081715 |
| C    | 4.011896 | 5.028335 | 7.068718 |
| H    | 4.310479 | 5.431826 | 8.036197 |
| C    | 3.743973 | 3.660598 | 6.943411 |
| H    | 3.838718 | 3.004439 | 7.810781 |

|    |           |           |           |
|----|-----------|-----------|-----------|
| C  | 3.372505  | 3.134241  | 5.701195  |
| C  | 3.249951  | 6.214043  | 3.498185  |
| H  | 2.180128  | 6.478908  | 3.448360  |
| H  | 3.828197  | 7.152422  | 3.511636  |
| C  | 3.160976  | 1.666704  | 5.421715  |
| H  | 4.098658  | 1.224297  | 5.044766  |
| H  | 2.867832  | 1.111596  | 6.327819  |
| C  | 5.034317  | 5.390411  | 2.007763  |
| H  | 5.504438  | 4.866149  | 2.851380  |
| H  | 5.419939  | 6.424650  | 1.977891  |
| C  | 5.340325  | 4.692617  | 0.688381  |
| H  | 6.417680  | 4.742454  | 0.484650  |
| H  | 5.045132  | 3.625782  | 0.742344  |
| C  | 3.275577  | 5.331372  | -0.211954 |
| H  | 2.889867  | 4.290445  | -0.190683 |
| H  | 2.835286  | 5.838151  | -1.080425 |
| C  | 2.885353  | 6.063489  | 1.066492  |
| H  | 3.191585  | 7.121720  | 0.995576  |
| H  | 1.798422  | 6.020729  | 1.225111  |
| C  | 0.751506  | 1.647793  | 4.895415  |
| H  | 0.657694  | 2.676633  | 5.269894  |
| H  | 0.619806  | 0.952068  | 5.742737  |
| C  | -0.293788 | 1.355356  | 3.826208  |
| H  | -1.297686 | 1.402305  | 4.267400  |
| H  | -0.233682 | 2.109622  | 3.016495  |
| C  | 1.149864  | -0.116867 | 2.715485  |
| H  | 1.278488  | 0.577702  | 1.858832  |
| H  | 1.202122  | -1.143376 | 2.330183  |
| C  | 2.252317  | 0.106529  | 3.743982  |
| H  | 2.169759  | -0.648079 | 4.545489  |
| H  | 3.244435  | 0.019903  | 3.278689  |
| N  | 3.559214  | 5.453497  | 2.250559  |
| N  | 2.134668  | 1.462907  | 4.355930  |
| O  | 4.684274  | 5.329959  | -0.403617 |
| O  | -0.140364 | 0.044542  | 3.290007  |
| Te | 2.679016  | 3.232944  | 2.763084  |

**Table S10.** Cartesian coordinates (Å) of the optimized structure (BP86/def2-TZVP) of the cation  $[\text{RTe}]^+$  (**4c**); one nitrogen atom coordinated to the tellurium atom.

| Atom | x        | y        | z        |
|------|----------|----------|----------|
| C    | 3.440378 | 4.087452 | 4.679429 |
| C    | 3.840382 | 5.419994 | 4.749578 |
| C    | 4.284252 | 5.910891 | 5.985542 |
| H    | 4.602581 | 6.951294 | 6.067473 |
| C    | 4.323857 | 5.070101 | 7.101194 |
| H    | 4.666467 | 5.460841 | 8.059381 |
| C    | 3.946819 | 3.725604 | 6.998490 |
| H    | 4.000046 | 3.074856 | 7.873529 |
| C    | 3.513203 | 3.218291 | 5.769883 |



|    |           |           |          |
|----|-----------|-----------|----------|
| C  | 3.868857  | 6.218180  | 3.463458 |
| H  | 4.896096  | 6.280317  | 3.068067 |
| H  | 3.321355  | 5.535879  | 2.684143 |
| C  | 3.200704  | 1.768054  | 5.508823 |
| H  | 4.096828  | 1.260045  | 5.115268 |
| H  | 2.879300  | 1.236228  | 6.418215 |
| C  | 1.902818  | 7.625907  | 3.900184 |
| H  | 1.729821  | 7.009839  | 4.794068 |
| H  | 1.252075  | 7.247666  | 3.084058 |
| C  | 1.554236  | 9.086733  | 4.188068 |
| H  | 0.476288  | 9.189977  | 4.367786 |
| H  | 2.100017  | 9.432142  | 5.087334 |
| C  | 3.258296  | 9.854638  | 2.777144 |
| H  | 3.849705  | 10.215404 | 3.640518 |
| H  | 3.430643  | 10.524500 | 1.925043 |
| C  | 3.676589  | 8.428384  | 2.419450 |
| H  | 3.175516  | 8.129893  | 1.476292 |
| H  | 4.764348  | 8.376872  | 2.264096 |
| C  | 0.771624  | 1.874097  | 5.029303 |
| H  | 0.744199  | 2.903156  | 5.412305 |
| H  | 0.629833  | 1.176655  | 5.872289 |
| C  | -0.308411 | 1.639879  | 3.980745 |
| H  | -1.298549 | 1.731245  | 4.445413 |
| H  | -0.229334 | 2.400113  | 3.177970 |
| C  | 1.037776  | 0.105052  | 2.828464 |
| H  | 1.189395  | 0.799417  | 1.974565 |
| H  | 1.029027  | -0.918903 | 2.433336 |
| C  | 2.171551  | 0.260381  | 3.834542 |
| H  | 2.061996  | -0.486643 | 4.638686 |
| H  | 3.149568  | 0.127192  | 3.352634 |
| N  | 3.309170  | 7.513700  | 3.505512 |
| N  | 2.136494  | 1.617291  | 4.463270 |
| O  | 1.865224  | 9.917493  | 3.074025 |
| O  | -0.229190 | 0.329772  | 3.429766 |
| Te | 2.670449  | 3.306523  | 2.883167 |

**Table S11.** Cartesian coordinates (Å) of the optimized structure (BP86/def2-TZVP) of the cation of  $[\text{RTe}]^+$  (**4d**); no nitrogen atom coordinated to the tellurium atom.

| Atom | x         | y         | z         |
|------|-----------|-----------|-----------|
| C    | 0.101170  | 0.274599  | 0.098933  |
| C    | 1.487199  | 0.343399  | 0.262202  |
| C    | 2.118401  | 1.586420  | 0.133194  |
| H    | 3.197738  | 1.667990  | 0.273743  |
| C    | 1.363745  | 2.726697  | -0.163786 |
| H    | 1.860279  | 3.691707  | -0.266192 |
| C    | -0.022839 | 2.639081  | -0.330439 |
| H    | -0.600092 | 3.532233  | -0.576223 |
| C    | -0.667539 | 1.403731  | -0.194919 |
| C    | 2.189602  | -0.935801 | 0.664049  |

|    |           |           |           |
|----|-----------|-----------|-----------|
| H  | 2.418931  | -0.968408 | 1.741607  |
| H  | 1.318354  | -1.754622 | 0.566727  |
| C  | -2.143615 | 1.176546  | -0.442084 |
| H  | -2.389926 | 1.161010  | -1.516330 |
| H  | -2.287800 | 0.027988  | -0.132221 |
| C  | 3.279368  | -1.327419 | -1.529439 |
| H  | 2.647031  | -0.500239 | -1.877587 |
| H  | 2.839322  | -2.280276 | -1.883361 |
| C  | 4.703571  | -1.197596 | -2.087264 |
| H  | 4.692843  | -1.338331 | -3.175383 |
| H  | 5.105432  | -0.192100 | -1.859784 |
| C  | 5.640295  | -2.093730 | -0.134031 |
| H  | 6.060468  | -1.111164 | 0.152553  |
| H  | 6.319863  | -2.885066 | 0.206620  |
| C  | 4.258521  | -2.278222 | 0.509662  |
| H  | 3.913631  | -3.313041 | 0.321811  |
| H  | 4.310440  | -2.118062 | 1.595738  |
| C  | -2.925507 | 2.193990  | 1.678766  |
| H  | -1.860831 | 2.209412  | 1.946431  |
| H  | -3.410874 | 1.354480  | 2.214188  |
| C  | -3.608960 | 3.507071  | 2.084167  |
| H  | -3.633533 | 3.592995  | 3.177777  |
| H  | -3.047725 | 4.365791  | 1.669670  |
| C  | -5.028900 | 3.441765  | 0.220379  |
| H  | -4.500502 | 4.292294  | -0.250273 |
| H  | -6.091075 | 3.487816  | -0.051157 |
| C  | -4.422086 | 2.117300  | -0.264608 |
| H  | -5.044716 | 1.282347  | 0.109937  |
| H  | -4.405371 | 2.076195  | -1.362811 |
| N  | 3.316335  | -1.323615 | -0.069618 |
| N  | -3.056535 | 1.990002  | 0.238855  |
| O  | 5.552931  | -2.204295 | -1.549603 |
| O  | -4.959592 | 3.535498  | 1.638231  |
| Te | -0.859352 | -1.592772 | 0.302668  |

**Table S12.** Cartesian coordinates (Å) of the optimized structure (BP86/def2-TZVP) of the dianion  $[\text{Hg}_2\text{Cl}_6]^{2-}$  (**4e**).

| Atom | x        | y         | z         |
|------|----------|-----------|-----------|
| Cl   | 8.333915 | -1.750968 | 0.885590  |
| Cl   | 6.600200 | 1.366764  | 3.232010  |
| Cl   | 5.883125 | 1.273770  | -0.964135 |
| Hg   | 6.514037 | -0.094459 | 1.222759  |
| Cl   | 1.645447 | 1.751008  | -0.885468 |
| Cl   | 3.379020 | -1.366687 | -3.232067 |
| Cl   | 4.096215 | -1.273872 | 0.964069  |
| Hg   | 3.465240 | 0.094445  | -1.222759 |

**Table S13.** Cartesian coordinates (Å) of the optimized (H atoms only) structure (BP86/def2-TZVP) of the anion [(RTe)(Hg<sub>2</sub>Cl<sub>6</sub>)]<sup>-</sup> (**4A**).

| <b>Atom</b> | <b>x</b>  | <b>y</b>  | <b>z</b>  |
|-------------|-----------|-----------|-----------|
| C           | 3.183252  | 4.090252  | 4.678322  |
| C           | 3.359312  | 5.469550  | 4.769337  |
| C           | 3.619561  | 6.012086  | 5.999147  |
| H           | 3.766982  | 7.092144  | 6.095314  |
| C           | 3.702121  | 5.215474  | 7.117909  |
| H           | 3.896655  | 5.669286  | 8.091124  |
| C           | 3.537300  | 3.850214  | 7.024796  |
| H           | 3.628531  | 3.225240  | 7.916965  |
| C           | 3.322097  | 3.255398  | 5.784558  |
| C           | 3.172337  | 6.254173  | 3.499865  |
| H           | 2.104144  | 6.516778  | 3.388019  |
| H           | 3.748609  | 7.196269  | 3.505623  |
| C           | 3.252234  | 1.779432  | 5.481080  |
| H           | 4.220911  | 1.442653  | 5.067877  |
| H           | 2.997327  | 1.164221  | 6.359286  |
| C           | 5.021566  | 5.389276  | 2.218644  |
| H           | 5.426751  | 4.862812  | 3.094295  |
| H           | 5.401545  | 6.428419  | 2.214990  |
| C           | 5.421209  | 4.683112  | 0.950961  |
| H           | 6.513225  | 4.707111  | 0.840278  |
| H           | 5.130709  | 3.615987  | 0.970809  |
| C           | 3.467012  | 5.297721  | -0.133625 |
| H           | 3.088713  | 4.254243  | -0.145146 |
| H           | 3.088851  | 5.797340  | -1.036936 |
| C           | 2.998073  | 6.046130  | 1.094972  |
| H           | 3.338251  | 7.097615  | 1.040730  |
| H           | 1.898926  | 6.036325  | 1.165382  |
| C           | 0.862322  | 1.662094  | 4.955369  |
| H           | 0.729216  | 2.676389  | 5.364058  |
| H           | 0.786572  | 0.944436  | 5.793382  |
| C           | -0.193763 | 1.335698  | 3.939028  |
| H           | -1.185729 | 1.316101  | 4.410307  |
| H           | -0.200043 | 2.075358  | 3.114832  |
| C           | 1.335618  | -0.072805 | 2.819808  |
| H           | 1.407112  | 0.602806  | 1.942556  |
| H           | 1.451470  | -1.094794 | 2.439059  |
| C           | 2.408439  | 0.217413  | 3.820403  |
| H           | 2.363312  | -0.519815 | 4.643262  |
| H           | 3.400104  | 0.151693  | 3.345670  |
| N           | 3.540587  | 5.443699  | 2.330117  |
| N           | 2.235401  | 1.563381  | 4.402610  |
| O           | 4.875426  | 5.325763  | -0.194718 |
| O           | 0.059642  | 0.019778  | 3.430623  |
| Te          | 2.720250  | 3.254870  | 2.838250  |
| Cl          | 8.038136  | -1.799680 | 0.657717  |
| Cl          | 6.300288  | 1.416295  | 3.035805  |
| Cl          | 5.872721  | 1.309464  | -0.937254 |

|    |          |           |           |
|----|----------|-----------|-----------|
| Hg | 6.524345 | -0.044991 | 1.167766  |
| Cl | 1.936271 | 1.788628  | -0.654922 |
| Cl | 3.674120 | -1.427346 | -3.033010 |
| Cl | 4.101686 | -1.320516 | 0.940049  |
| Hg | 3.450063 | 0.033939  | -1.164972 |

---
